# Supplementary material for: BBB security for 5-round even-Mansour-based key-alternating Feistel ciphers
Source: Springer Nature journal article supplement (doi:10.1007/s10623-023-01288-4), 2023-10-04
Supplement: MOESM1 [file 26128590]

## Supplementary Material

### A Bounding the Probabilities of the Bad Events

#### A.1 Bounding **bad $\tau$ -switch**

Let's first fix a pair of values for the indices  $i$  and  $j$ . If  $j \in \mathcal{I}_{\text{enc}}$ , then the probability of the event  $(S^j, T^j) = (S^i, T^i)$  comes out to be  $(1/N) \cdot (1/N)$  due to the  $n$ -bit randomness over each of  $S^j$  and  $T^j$ . Similarly, if  $j \in \mathcal{I}_{\text{dec}}$ , then the probability of the event  $(L^j, R^j) = (L^i, R^i)$  comes out to be  $(1/N) \cdot (1/N)$  due to the  $n$ -bit randomness over each of  $L^j$  and  $R^j$ . As we can choose the pair of indices  $(i, j)$  in  $\binom{q}{2}$  ways, we use the union bound over all those possible choices to obtain

$$\Pr[\text{bad}\tau\text{-switch}] \leq \frac{\binom{q}{2}}{N^2}. \quad (87)$$

#### A.2 Bounding **bad $\tau$ - $\hat{Y}$**

Let's first fix a pair of values for the indices  $i$  and  $j$ . If  $j \in \mathcal{I}_{\text{enc}}$ , then the probability of each of the events  $S^i = S^j$  and  $L^i + T^i = L^j + T^j$  comes out to be  $(1/N^2)$  due to the  $n$ -bit randomness over  $S^j$  and  $T^j$  respectively. Similarly if  $j \in \mathcal{I}_{\text{dec}}$ , then the probability of each of the events  $R^i = R^j$  and  $L^i + T^i = L^j + T^j$  comes out to be  $(1/N^2)$  due to the  $n$ -bit randomness over  $R^j$  and  $L^j$  respectively. As we can choose the pair of indices  $(i, j)$  in  $\binom{q}{2}$  ways, we use the union bound over all those possible choices to obtain

$$\Pr[\text{bad}\tau\text{-}\hat{Y}] \leq \frac{\binom{q}{2}}{N^2}. \quad (88)$$

#### A.3 Bounding **bad $\tau$ -3path**

**Proposition 4** *Having defined the bad event **bad $\tau$ -3path** in Fig. 3, we have*

$$\Pr[\text{bad}\tau\text{-3path}] \leq \frac{\binom{q}{3}}{N^2}.$$

To prove the proposition, let's first fix three distinct values for the indices  $i, j$  and  $l$ . We'll study this bad event in the following four sub-cases.

- **bad $\tau$ -3path-1:** If  $j, l \in \mathcal{I}_{\text{dec}}$ , then  $\Pr[R^i = R^j = R^l] = \Pr[R^i = R^j] \cdot \Pr[R^i = R^j = R^l | R^i = R^j]$  (as  $\Pr[R^i = R^j = R^l | R^i \neq R^j] = 0$ ). This probability comes out to be  $(1/N^2)$ . The  $n$ -bit randomness for the first term on the RHS comes from  $R^j$  and the same randomness for the second term on the RHS comes from  $R^l$ .
- **bad $\tau$ -3path-2:** If  $j, l \in \mathcal{I}_{\text{enc}}$ , then  $\Pr[S^i = S^j = S^l] = \Pr[S^i = S^j] \cdot \Pr[S^i = S^j = S^l | S^i = S^j]$  (as  $\Pr[S^i = S^j = S^l | S^i \neq S^j] = 0$ ). This probability comes out to be  $(1/N^2)$ . The  $n$ -bit randomness for the first term on the RHS comes from  $S^j$  and the same randomness for the second term on the RHS comes from  $S^l$ .
- **bad $\tau$ -3path-3:** If  $j \in \mathcal{I}_{\text{dec}}$  and  $l \in \mathcal{I}_{\text{enc}}$ , then the probability of each of the events  $R^i = R^j = R^l$  and  $S^i = S^j = S^l$  comes out to be  $(1/N)$ . The  $n$ -bit randomness comes from  $R^j$  and  $S^l$  respectively.
- **bad $\tau$ -3path-4:** If  $j \in \mathcal{I}_{\text{enc}}$  and  $l \in \mathcal{I}_{\text{dec}}$ , then the probability of each of the events  $R^i = R^j = R^l$  and  $S^i = S^j = S^l$  comes out to be  $(1/N)$ . The  $n$ -bit randomness comes from  $R^l$  and  $S^j$  respectively.

As we can choose the 3-tuple of indices  $(i, j, l)$  in  $\binom{q}{3}$  ways, we use the union bound over all those possible choices to obtain

$$\Pr[\mathbf{bad}\tau\text{-3path}] \leq \frac{\binom{q}{3}}{N^2}. \quad (89)$$

#### A.4 Bounding **bad $\tau$ -3coll**

Once we fix three distinct values for the indices  $i, j$  and  $l$ , the analysis of this bad event exactly corresponds to the first two sub-cases of the previous bad event (e.g., **bad $\tau$ -3path**). As we can choose the 3-tuple of indices  $(i, j, l)$  in  $\binom{q}{3}$  ways, we use the union bound over all those possible choices to obtain

$$\Pr[\mathbf{bad}\tau\text{-3coll}] \leq \frac{\binom{q}{3}}{N^2}. \quad (90)$$

#### A.5 Bounding **badK-outer**

**Proposition 5** *Having defined the bad event **badK-outer** in Fig. 4, we have*

$$\Pr[\mathbf{badK-outer}] \leq \frac{qq_1q_5 + q^2(q_1 + q_5)}{N^2}.$$

To prove this proposition, we note that this bad event occurs when one of the following happens. Note that the event  $\mathcal{I}_{RR} \cap \mathcal{I}_{SS} \neq \emptyset$  is an impossible event as  $\mathcal{I}_{RR} \subseteq \mathcal{I}_{\text{dec}}$  and  $\mathcal{I}_{SS} \subseteq \mathcal{I}_{\text{enc}}$  from definition.

- **badK-outer-1**  $\mathcal{I}_R \cap \mathcal{I}_S \neq \emptyset$ . This bad event occurs when for some  $i \in [q]$ ,  $j \in [q_1]$  and  $l \in [q_5]$ ,  $R^i + K_1 = U_1^j$  and  $S^i + K_5 = U_5^l$ . Let's first fix the values for the indices  $i, j$  and  $l$ . Then the probability of each of the events  $R^i + K_1 = U_1^j$  and  $S^i + K_5 = U_5^l$  comes out to be  $(1/N)$ . The  $n$ -bit randomness comes from the keys  $K_1$  and  $K_5$  respectively. As we can choose the indices  $i, j$  and  $l$  in  $q, q_1$  and  $q_5$  ways respectively, we use the union bound over all those possible choices to obtain

$$\Pr[\mathcal{I}_R \cap \mathcal{I}_S \neq \emptyset] \leq \frac{qq_1q_5}{N^2}. \quad (91)$$

- **badK-outer-2**  $\mathcal{I}_R \cap \mathcal{I}_{RR} \neq \emptyset$ . This bad event occurs when for some  $i \in \mathcal{I}_{\text{dec}}$ ,  $j \in [q_1]$  and  $l \in [i-1]$ ,  $R^i + K_1 = U_1^j$  and  $R^i = R^l$ . Let's first fix the values for the indices  $i, j$  and  $l$ . The probability of the event  $R^i + K_1 = U_1^j$  comes out to be  $(1/N)$ . The  $n$ -bit randomness comes from the key  $K_1$ . The probability of the event  $R^i = R^l$  also comes out to be  $(1/N)$ . The  $n$ -bit randomness comes from  $R^i$  as  $i > l$  and  $i \in \mathcal{I}_{\text{dec}}$ . As we can choose the pair of indices  $(i, l)$  in  $\binom{q}{2}$  ways and the index  $j$  in  $q_1$  ways, we use the union bound over all those possible choices to obtain

$$\Pr[\mathcal{I}_R \cap \mathcal{I}_{RR} \neq \emptyset] \leq \frac{q_1 \binom{q}{2}}{N^2}. \quad (92)$$

- **badK-outer-3**  $\mathcal{I}_S \cap \mathcal{I}_{SS} \neq \emptyset$ . This bad event occurs when for some  $i \in \mathcal{I}_{\text{enc}}$ ,  $j \in [q_5]$  and  $l \in [i-1]$ ,  $S^i + K_5 = U_5^j$  and  $S^i = S^l$ . Let's first fix the values for the indices  $i, j$  and  $l$ . The probability of the event  $S^i + K_5 = U_5^j$  comes out to be  $(1/N)$ . The  $n$ -bit randomness comes from the key  $K_5$ . The probability of the event  $S^i = S^l$  also comes

out to be  $(1/N)$ . The  $n$ -bit randomness comes from  $S^i$  as  $i > l$  and  $i \in \mathcal{I}_{\text{enc}}$ . As we can choose the pair of indices  $(i, l)$  in  $\binom{q}{2}$  ways and the index  $j$  in  $q_5$  ways, we use the union bound over all those possible choices to obtain

$$\Pr[\mathcal{I}_S \cap \mathcal{I}_{SS} \neq \emptyset] \leq \frac{q_5 \binom{q}{2}}{N^2}. \quad (93)$$

- **badK-outer-4**  $\mathcal{I}_R \cap \mathcal{I}_{SS} \neq \emptyset$ . This bad event occurs when for some  $i \in \mathcal{I}_{\text{enc}}$ ,  $j \in [q_1]$  and  $l \in [i-1]$ ,  $R^i + K_1 = U_1^j$  and  $S^i = S^l$ . Let's first fix the values for the indices  $i$ ,  $j$  and  $l$ . The probability of the event  $R^i + K_1 = U_1^j$  comes out to be  $(1/N)$ . The  $n$ -bit randomness comes from the key  $K_1$ . The probability of the event  $S^i = S^l$  also comes out to be  $(1/N)$ . The  $n$ -bit randomness comes from  $S^i$  as  $i > l$  and  $i \in \mathcal{I}_{\text{enc}}$ . As we can choose the pair of indices  $(i, l)$  in  $\binom{q}{2}$  ways and the index  $j$  in  $q_1$  ways, we use the union bound over all those possible choices to obtain

$$\Pr[\mathcal{I}_S \cap \mathcal{I}_{SS} \neq \emptyset] \leq \frac{q_1 \binom{q}{2}}{N^2}. \quad (94)$$

- **badK-outer-5**  $\mathcal{I}_S \cap \mathcal{I}_{RR} \neq \emptyset$ . This bad event occurs when for some  $i \in \mathcal{I}_{\text{dec}}$ ,  $j \in [q_5]$  and  $l \in [i-1]$ ,  $S^i + K_5 = U_5^j$  and  $R^i = R^l$ . Let's first fix the values for the indices  $i$ ,  $j$  and  $l$ . The probability of the event  $S^i + K_5 = U_5^j$  comes out to be  $(1/N)$ . The  $n$ -bit randomness comes from the key  $K_5$ . The probability of the event  $R^i = R^l$  also comes out to be  $(1/N)$ . The  $n$ -bit randomness comes from  $R^i$  as  $i > l$  and  $i \in \mathcal{I}_{\text{dec}}$ . As we can choose the pair of indices  $(i, l)$  in  $\binom{q}{2}$  ways and the index  $j$  in  $q_5$  ways, we use the union bound over all those possible choices to obtain

$$\Pr[\mathcal{I}_R \cap \mathcal{I}_{RR} \neq \emptyset] \leq \frac{q_5 \binom{q}{2}}{N^2}. \quad (95)$$

Adding the probabilities of all these sub-cases, we obtain

$$\Pr[\text{badK-outer}] \leq \frac{qq_1q_5 + q^2(q_1 + q_5)}{N^2}. \quad (96)$$

## A.6 Bounding **badK-source**

**Proposition 6** *Having defined the bad event **badK-source** in Fig. 4, we have*

$$\Pr[\text{badK-source}] \leq \frac{(q_1 + q_5) \binom{q}{2} + 2 \binom{q}{3}}{N^2}.$$

This bad event occurs when one of the following happens.

- **badK-source1**.  $\exists i \in \mathcal{I}_S$ ,  $j \in \mathcal{I}_{RR}$ ,  $i < j$  and  $R^i = R^j$ . In other words,  $\exists i \in [q]$  and  $j \in \mathcal{I}_{\text{dec}}$  with  $i < j$  and  $l \in [q_5]$  such that  $S^i + K_5 = U_5^l$  and  $R^i = R^j$ . Let's first fix the values for the indices  $i$ ,  $j$  and  $l$ . The probability of each of the events  $S^i + K_5 = U_5^l$  and  $R^i = R^j$  comes out to be  $(1/N)$ . The  $n$ -bit randomness comes from the key  $K_5$  and  $R_j$  respectively. As we can choose the pair of indices  $(i, j)$  in  $\binom{q}{2}$  ways and the index  $l$  in  $q_5$  ways, we use the union bound over all those possible choices to obtain

$$\Pr[\text{badK-source1}] \leq \frac{q_5 \binom{q}{2}}{N^2}. \quad (97)$$

- **badK-source2**.  $\exists i \in \mathcal{I}_{SS}, j \in \mathcal{I}_{RR}, i < j$  and  $R^i = R^j$ . In other words,  $\exists l \in [q], i \in \mathcal{I}_{\text{enc}}$  and  $j \in \mathcal{I}_{\text{dec}}$  with  $k < i < j$  such that  $R^i = R^j$  and  $S^i = S^k$ . Let's first fix the values for the indices  $i, j$  and  $l$ . The probability of each of the events  $R^i = R^j$  and  $S^i = S^k$  comes out to be  $(1/N)$ . The  $n$ -bit randomness comes from  $R_j$  and  $S_i$  respectively. As we can choose the 3-tuple of indices  $(i, j, l)$  in  $\binom{q}{3}$  ways, we use the union bound over all those possible choices to obtain

$$\Pr[\text{badK-source2}] \leq \frac{\binom{q}{3}}{N^2}. \quad (98)$$

- **badK-source3**.  $\exists i \in \mathcal{I}_R, j \in \mathcal{I}_{SS}, i < j$  and  $S^i = S^j$ . In other words,  $\exists i \in [q]$  and  $j \in \mathcal{I}_{\text{enc}}$  with  $i < j$  and  $l \in [q_1]$  such that  $R^i + K_1 = U_1^l$  and  $S^i = S^j$ . Let's first fix the values for the indices  $i, j$  and  $l$ . The probability of each of the events  $R^i + K_1 = U_1^l$  and  $S^i = S^j$  comes out to be  $(1/N)$ . The  $n$ -bit randomness comes from the key  $K_1$  and  $S_j$  respectively. As we can choose the pair of indices  $(i, j)$  in  $\binom{q}{2}$  ways and the index  $l$  in  $q_1$  ways, we use the union bound over all those possible choices to obtain

$$\Pr[\text{badK-source3}] \leq \frac{q_1 \binom{q}{2}}{N^2}. \quad (99)$$

- **badK-source4**.  $\exists i \in \mathcal{I}_{RR}, j \in \mathcal{I}_{SS}, i < j$  and  $S^i = S^j$ . In other words,  $\exists l \in [q], i \in \mathcal{I}_{\text{dec}}$  and  $j \in \mathcal{I}_{\text{enc}}$  with  $k < i < j$  such that  $S^i = S^j$  and  $R^i = R^k$ . Let's first fix the values for the indices  $i, j$  and  $l$ . The probability of each of the events  $S^i = S^j$  and  $R^i = R^k$  comes out to be  $(1/N)$ . The  $n$ -bit randomness comes from  $S_j$  and  $R_i$  respectively. As we can choose the 3-tuple of indices  $(i, j, l)$  in  $\binom{q}{3}$  ways, we use the union bound over all those possible choices to obtain

$$\Pr[\text{badK-source4}] \leq \frac{\binom{q}{3}}{N^2}. \quad (100)$$

Adding the probabilities of all these sub-cases, we obtain

$$\Pr[\text{badK-source}] \leq \frac{(q_1 + q_5) \binom{q}{2} + 2 \binom{q}{3}}{N^2}. \quad (101)$$

## A.7 Bounding **bad $\mu$ -in&out**

**Proposition 7** *Having defined the bad event **bad $\mu$ -in&out** in Fig. 7, we have*

$$\Pr[\text{bad}\mu\text{-in\&out}] \leq \frac{q^2(3q_1 + 3q_5 + q_2 + q_3 + q_4)}{N^2} + \frac{5q^3}{N^2} + \frac{qq_1(q_3 + q_4 + q_5)}{N^2} \\ + \frac{qq_5(q_2 + q_3 + q_4)}{N^2} + \frac{2q^2q_1q_5}{N^3} + \frac{2q^3(q_1 + q_5)}{N^3} + \frac{2q^2}{N^2}.$$

This bad event occurs when  $(\mathcal{I}_R \sqcup \mathcal{I}_S \sqcup \mathcal{I}_{RR} \sqcup \mathcal{I}_{SS}) \cap (\mathcal{I}_X \cup \mathcal{I}_{XX} \cup \mathcal{I}_{\hat{Y}} \cup \mathcal{I}_{\hat{Y}\hat{Y}} \cup \mathcal{I}_Z \cup \mathcal{I}_{ZZ}) \neq \emptyset$ . Note that, by definition  $\mathcal{I}_R \cap \mathcal{I}_{XX} = \emptyset$  and  $\mathcal{I}_S \cap \mathcal{I}_{ZZ} = \emptyset$ . We individually bound each of the bad events as follows:

- **bad $\mu$ -in&out-1**.  $\mathcal{I}_R \cap \mathcal{I}_X \neq \emptyset$ . This bad event occurs when  $\exists i \in [q], j \in [q_1]$  and  $l \in [q_5]$  such that  $R^i + K_1 = U_1^j$  and  $X^i + K_2 = U_2^l$ . Let's first fix the values for the indices  $i, j$  and  $l$ . The probability of each of the events  $R^i + K_1 = U_1^j$  and  $X^i + K_2 = U_2^l$  comes out to be  $(1/N)$  due to the  $n$ -bit randomness over the keys  $K_1$  and  $K_2$  respectively. As we can choose the indices  $i, j$  and  $l$  in  $q, q_1$  and  $q_5$  ways respectively, we use the union bound over all those possible choices to obtain

$$\Pr[\text{bad}\mu\text{-in\&out-1}] \leq \frac{qq_1q_5}{N^2}. \quad (102)$$

- **bad $\mu$ -in&out-2.**  $\mathcal{I}_{RR} \cap \mathcal{I}_X \neq \emptyset$ . This bad event occurs when  $\exists i \in \mathcal{I}_{\text{dec}}, j \in [i-1]$  and  $l \in [q_2]$  such that  $R^i = R^j$  and  $X^i + K_2 = U_2^l$ . Let's first fix the values for the indices  $i, j$  and  $l$ . The probability of each of the events  $R^i = R^j$  and  $X^i + K_2 = U_2^l$  comes out to be  $(1/N)$  due to the  $n$ -bit randomness over  $R^i$  and  $K_2$  respectively. As we can choose the pair of indices  $(i, j)$  in  $\binom{q}{2}$  ways and the index  $l$  in  $q_2$  ways, we use the union bound over all those possible choices to obtain

$$\Pr[\text{bad}\mu\text{-in}\&\text{out-2}] \leq \frac{q_2 \binom{q}{2}}{N^2}. \quad (103)$$

- **bad $\mu$ -in&out-3.**  $\mathcal{I}_{RR} \cap \mathcal{I}_{XX} \neq \emptyset$ . This bad event occurs when  $\exists i \in \mathcal{I}_{\text{dec}}, j \in [i-1]$ , and  $l \in [q]$  with  $i \neq l$  such that  $R^i = R^j$  and  $X^i = X^l$ , which we equivalently write as

$$R^i = R^j, \widehat{R}^i + \widehat{R}^l = L^i + L^l.$$

We analyze this event into two separate subcases: (a) when  $l = j$  and if  $j$  is a decryption query, then, the above event boils down to the event  $R^i = R^j, L^i = L^j$ , which triggers the bad event **bad $r$ -switch**. Therefore, we analyse the case (b) when  $l \neq j$ . In this case, we use the randomness of  $R^i$  and  $\widehat{R}^i$  to bound the above event to at most  $(2/N^2)$  As we can choose the pair of indices  $\{i, j\}$  in  $\binom{q}{2}$  ways and for each of those choices, we can choose the index  $l$  in  $(q-1)$  ways, we use the union bound over all those possible choices to obtain

$$\Pr[\text{bad}\mu\text{-in}\&\text{out-3}] \leq \frac{q^3}{N^2}. \quad (104)$$

- **bad $\mu$ -in&out-4.**  $\mathcal{I}_R \cap \mathcal{I}_{\widehat{Y}} \neq \emptyset$ . This bad event occurs when  $\exists i \in [q], j \in [q_1]$  and  $k \in [q_3]$  such that  $R^i + K_1 = U_1^j$  and  $\widehat{Y}^i + K_3 = V_3^k$ , which we equivalently write as

$$R^i + K_1 = U_1^j, \widehat{R}^i + L^i + \widehat{S}^i + T^i + K_3 = V_3^k.$$

For a fixed choice of indices, the probability of the event is at most  $1/N^2$  due to the  $n$ -bit randomness over  $K_1$  and  $K_3$ . We can choose the triplet of indices  $(i, j, k)$  is at most  $qq_1q_3$  ways, we use the union bound over all those possible choices to obtain

$$\Pr[\text{bad}\mu\text{-in}\&\text{out-4}] \leq \frac{qq_1q_3}{N^2}. \quad (105)$$

- **bad $\mu$ -in&out-5.**  $\mathcal{I}_R \cap \mathcal{I}_{\widehat{Y}} \neq \emptyset$ . This bad event occurs when  $\exists i \in [q], j \in [q]$  and  $k \in [q_1]$  such that  $R^i + K_1 = U_1^k$  and  $\widehat{Y}^i = \widehat{Y}^j$ , which we equivalently write as

$$R^i + K_1 = U_1^k, \widehat{R}^i + \widehat{S}^i + \widehat{R}^j + \widehat{S}^j = L^i + L^j + T^i + T^j.$$

For a fixed choice of indices, the probability of the event is at most  $2/N^2$  due to the  $n$ -bit randomness over  $K_1$  and the  $n$ -bit randomness over  $\widehat{S}^i$  (note that  $i \notin \mathcal{I}_S$  and  $i \notin \mathcal{I}_{SS}$ ). As we can choose the pair of indices  $\{i, j\}$  in  $\binom{q}{2}$  ways and for each of those choices, we can choose the index  $k$  in  $q_1$  ways, we use the union bound over all those possible choices to obtain

$$\Pr[\text{bad}\mu\text{-in}\&\text{out-5}] \leq \frac{q^2q_1}{N^2}. \quad (106)$$

- **bad $\mu$ -in&out-6.**  $\mathcal{I}_R \cap \mathcal{I}_Z \neq \emptyset$ . This bad event occurs when  $\exists i \in [q], j \in [q_1]$  and  $k \in [q_4]$  such that  $R^i + K_1 = U_1^j$  and  $Z^i + K_4 = U_4^k$ , which we equivalently write as

$$R^i + K_1 = U_1^j, \widehat{S}^i + T^i + K_4 = U_4^k.$$

For a fixed choice of indices, the probability of the event is at most  $1/N^2$  due to the  $n$ -bit randomness over  $K_1$  and  $K_4$ . However, the total number of choices of the indices is at most  $qq_1q_4$ , we use the union bound over all those possible choices to obtain

$$\Pr[\text{bad}\mu\text{-in}\&\text{out-6}] \leq \frac{qq_1q_4}{N^2}. \quad (107)$$

- **bad $\mu$ -in&out-7.**  $\mathcal{I}_R \cap \mathcal{I}_{ZZ} \neq \emptyset$ . This bad event occurs when  $\exists i \in [q], j \in [q]$  and  $k \in [q_1]$  such that  $R^i + K_1 = U_1^k$  and  $Z^i = Z^j$ , which we equivalently write as

$$R^i + K_1 = U_1^k, \widehat{S}^i + T^i = \widehat{S}^j + T_j.$$

For a fixed choice of indices, the probability of the event is at most  $2/N^2$  due to the  $n$ -bit randomness over  $K_1$  and  $\widehat{S}^i$  (note that  $\widehat{S}^i$  is freshly sampled as  $i \notin \mathcal{I}_S$  and  $i \notin \mathcal{I}_{SS}$ ). However, the total number of choices of the indices is at most  $\binom{q}{2}q_1$ , we use the union bound over all those possible choices to obtain

$$\Pr[\text{bad}\mu\text{-in}\&\text{out-7}] \leq \frac{q^2 q_1}{N^2}. \quad (108)$$

- **bad $\mu$ -in&out-8.**  $\mathcal{I}_S \cap \mathcal{I}_X \neq \emptyset$ . Analysis of this case is similar to that of **bad $\mu$ -in&out-1.**, where we use the randomness of  $K_5$  and  $K_2$ . Looking ahead, we bound the probability to be at most

$$\Pr[\text{bad}\mu\text{-in}\&\text{out-8}] \leq \frac{qq_2q_5}{N^2}. \quad (109)$$

- **bad $\mu$ -in&out-9.**  $\mathcal{I}_S \cap \mathcal{I}_{XX} \neq \emptyset$ . Analysis of this case is again similar to that of **bad $\mu$ -in&out-7.**, where we use the randomness of  $K_5$  and  $\widehat{R}^i$ . Looking ahead, we bound the probability to be at most

$$\Pr[\text{bad}\mu\text{-in}\&\text{out-9}] \leq \frac{q^2 q_5}{N^2}. \quad (110)$$

- **bad $\mu$ -in&out-10.**  $\mathcal{I}_S \cap \mathcal{I}_{\widehat{Y}} \neq \emptyset$ . Analysis of this case is again similar to that of **bad $\mu$ -in&out-4.**, where we use the randomness of  $K_5$  and  $K_3$ . Looking ahead, we bound the probability to be at most

$$\Pr[\text{bad}\mu\text{-in}\&\text{out-10}] \leq \frac{qq_3q_5}{N^2}. \quad (111)$$

- **bad $\mu$ -in&out-11.**  $\mathcal{I}_S \cap \mathcal{I}_{\widehat{Y}\widehat{Y}} \neq \emptyset$ . Analysis of this case is again similar to that of **bad $\mu$ -in&out-5.**, where we use the randomness of  $K_5$  and  $\widehat{R}^i$ . Looking ahead, we bound the probability to be at most

$$\Pr[\text{bad}\mu\text{-in}\&\text{out-11}] \leq \frac{q^2 q_5}{N^2}. \quad (112)$$

- **bad $\mu$ -in&out-12.**  $\mathcal{I}_S \cap \mathcal{I}_Z \neq \emptyset$ . Analysis of this case is again similar to that of **bad $\mu$ -in&out-6.**, where we use the randomness of  $K_5$  and  $K_4$ . Looking ahead, we bound the probability to be at most

$$\Pr[\text{bad}\mu\text{-in}\&\text{out-12}] \leq \frac{qq_4q_5}{N^2}. \quad (113)$$

- **bad $\mu$ -in&out-13.**  $\mathcal{I}_{RR} \cap \mathcal{I}_{\widehat{Y}} \neq \emptyset$ . This bad event occurs when  $\exists i \in \mathcal{I}_{\text{dec}}, j \in [i-1]$  and  $k \in [q_3]$  such that  $R^i = R^j$  and  $\widehat{Y}^i + K_3 = V_3^k$ , which we equivalently write as

$$R^i = R^j, \widehat{R}^i + L^i + \widehat{S}^i + T^i + K_3 = V_3^k.$$

For a fixed choice of indices, the probability of the event is at most  $1/N^2$  due to the  $n$ -bit randomness over  $R^i$  and  $K_3$ . We can choose the triplet of indices  $(i, j, k)$  is at most  $\binom{q}{2}q_3$  ways, we use the union bound over all those possible choices to obtain

$$\Pr[\text{bad}\mu\text{-in}\&\text{out-13}] \leq \frac{q^2 q_3}{2N^2}. \quad (114)$$

- **bad $\mu$ -in&out-14.**  $\mathcal{I}_{RR} \cap \mathcal{I}_{\widehat{Y}\widehat{Y}} \neq \emptyset$ . This bad event occurs when  $\exists i \in \mathcal{I}_{\text{dec}}, j \in [i-1]$  and  $k \in [q]$  such that  $R^i = R^j$  and  $\widehat{Y}^i = \widehat{Y}^k$ , which we equivalently write as

$$R^i = R^j, \widehat{R}^i + \widehat{S}^i + \widehat{R}^k + \widehat{S}^k = L^i + L^k + T^i + T^k.$$

Now, we consider two separate subcases: (i) if  $k = j$  and it is a decryption query, then the above event boils down to  $R^i = R^j, L^i + L^j = T^i + T^j$  (assuming in both of the decryption queries  $S$  values are same). Then, using the randomness of  $R^i$  and  $L^i$ , we bound the above probability to be at most  $1/N^2$ . Moreover, the number of choices for  $(i, j)$  to be at most  $\binom{q}{2}$ . Therefore, by using the union bound, the probability of the above event is at most  $q^2/2N^2$ .

Now, we consider the other case when  $k \neq j$ . In this case, we use the randomness of  $R^i$  and  $\widehat{R}^i$  to bound the above event to at most  $2/N^2$ . The number of choices for triplets  $(i, j, k)$  is  $q^3$ . Therefore, by using the union bound, the probability of the above event is at most  $q^3/N^2$ .

Combining the above two cases, we obtain

$$\Pr[\text{bad}\mu\text{-in}\&\text{out-14}] \leq \frac{q^2}{2N^2} + \frac{q^3}{N^2}. \quad (115)$$

- **bad $\mu$ -in&out-15.**  $\mathcal{I}_{RR} \cap \mathcal{I}_Z \neq \emptyset$ . This bad event occurs when  $\exists i \in \mathcal{I}_{\text{dec}}, j \in [i-1]$  and  $k \in [q_4]$  such that  $R^i = R^j$  and  $Z^i + K_4 = U_4^k$ , which we equivalently write as

$$R^i = R^j, \widehat{S}^i + T^i + K_4 = U_4^k.$$

For a fixed choice of indices, the probability of the event is at most  $1/N^2$  due to the  $n$ -bit randomness over  $R^i$  and  $K_4$ . However, the total number of choices of the indices is at most  $\binom{q}{2}q_4$ , we use the union bound over all those possible choices to obtain

$$\Pr[\text{bad}\mu\text{-in}\&\text{out-15}] \leq \frac{q^2q_4}{2N^2}. \quad (116)$$

- **bad $\mu$ -in&out-16.**  $\mathcal{I}_{RR} \cap \mathcal{I}_{ZZ} \neq \emptyset$ . This bad event occurs when  $\exists i \in \mathcal{I}_{\text{dec}}, j \in [i-1]$  and  $k \in [q]$  such that  $R^i = R^j$  and  $Z^i = Z^k$ , which we equivalently write as

$$R^i = R^j, \widehat{S}^i + T^i = \widehat{S}^k + T^k.$$

For a fixed choice of indices, the probability of the event is at most  $2/N^2$  due to the  $n$ -bit randomness over  $\widehat{R}^i$  and  $\widehat{S}^i$  (note that  $\widehat{S}^i$  is freshly sampled as  $S^i \neq S^j$  and  $i \notin \mathcal{I}_S$ ). However, the total number of choices of the indices is at most  $\binom{q}{2}q$ , we use the union bound over all those possible choices to obtain

$$\Pr[\text{bad}\mu\text{-in}\&\text{out-16}] \leq \frac{q^3}{2N^2}. \quad (117)$$

- **bad $\mu$ -in&out-17.**  $\mathcal{I}_{SS} \cap \mathcal{I}_X \neq \emptyset$ . Analysis of this bad event is similar to that of **bad $\mu$ -in&out-12**, where we use the randomness of  $S^i$  and  $K_2$ . Looking ahead, we bound the probability of the event to at most

$$\Pr[\text{bad}\mu\text{-in}\&\text{out-17}] \leq \frac{q_2 \binom{q}{2}}{N^2}. \quad (118)$$

- **bad $\mu$ -in&out-18.**  $\mathcal{I}_{SS} \cap \mathcal{I}_{XX} \neq \emptyset$ . This bad event occurs when  $\exists i \in \mathcal{I}_{\text{enc}}, j \in [i-1]$ , and  $l \in [q]$  with  $i \neq l$  such that  $S^i = S^j$  and  $X^i = X^l$ , which we equivalently write as

$$S^i = S^j, \widehat{R}^i + \widehat{R}^l = L^i + L^l.$$

We use the randomness of  $S^i$  and  $\widehat{R}^i$  to bound the above event to at most  $(2/N^2)$  As we can choose the pair of indices  $\{i, j\}$  in  $\binom{q}{2}$  ways and for each of those choices, we can choose the index  $l$  in  $(q-1)$  ways, we use the union bound over all those possible choices to obtain

$$\Pr[\text{bad}\mu\text{-in}\&\text{out-18}] \leq \frac{q^3}{N^2}. \quad (119)$$

- **bad $\mu$ -in&out-19**.  $\mathcal{I}_{SS} \cap \mathcal{I}_{\widehat{Y}} \neq \emptyset$ . Analysis of this bad event is similar to that of **bad $\mu$ -in&out-13**, where we use the randomness of  $S^i$  and  $K_3$ . Looking ahead, we bound the probability of the event to at most

$$\Pr[\text{bad}\mu\text{-in\&out-19}] \leq \frac{q^2 q_3}{2N^2}. \quad (120)$$

- **bad $\mu$ -in&out-20**.  $\mathcal{I}_{SS} \cap \mathcal{I}_{\widehat{Y}} \neq \emptyset$ . Analysis of this bad event is similar to that of **bad $\mu$ -in&out-16**, where we use the randomness of  $S^i$  instead of  $R^i$ , wherever applicable. Looking ahead, we bound the probability of the above event to at most

$$\Pr[\text{bad}\mu\text{-in\&out-20}] \leq \frac{q^2}{2N^2} + \frac{q^3}{N^2}. \quad (121)$$

- **bad $\mu$ -in&out-21**.  $\mathcal{I}_{SS} \cap \mathcal{I}_Z \neq \emptyset$ . Analysis of this bad event is similar to that of **bad $\mu$ -in&out-15**, where we use the randomness of  $S^i$  and  $K_4$ . Looking ahead, we bound the above event to at most

$$\Pr[\text{bad}\mu\text{-in\&out-21}] \leq \frac{q^2 q_4}{2N^2}. \quad (122)$$

- **bad $\mu$ -in&out-22**.  $\mathcal{I}_{SS} \cap \mathcal{I}_{ZZ} \neq \emptyset$ . Again, the analysis of this bad event is similar to that of **bad $\mu$ -in&out-3**, where we use the randomness of  $S^i$ , wherever applicable. Looking ahead, we bound the above probability to be at most

$$\Pr[\text{bad}\mu\text{-in\&out-22}] \leq \frac{q^3}{2N^2}. \quad (123)$$

By combining Eqn. (102)-Eqn. (123), we obtain

$$\begin{aligned} \Pr[\text{bad}\mu\text{-in\&out}] &\leq \frac{q^2(2q_1 + 2q_5 + q_2 + q_3 + q_4)}{N^2} + \frac{5q^3}{N^2} + \frac{qq_1(q_3 + q_4 + q_5)}{N^2} \\ &\quad + \frac{qq_5(q_2 + q_3 + q_4)}{N^2} + \frac{2q^2}{N^2}. \end{aligned} \quad (124)$$

## A.8 Bounding **bad $\mu$ -source**

**Proposition 8** *Having defined the bad event **bad $\mu$ -source** in Fig. 7, we have*

$$\Pr[\text{bad}\mu\text{-source}] \leq \frac{2\binom{q}{2}(q_1 + q_5)}{N^2}.$$

To prove the proposition, we first fix the values for the indices  $i, j$  and  $l$ .

- **bad $\mu$ -source-1**.  $i, j \in [q]$  with  $i \neq j$  and  $l \in [q_1]$  such that  $R^i + K_1 = U_1^l$  and  $\widehat{R}^i + \widehat{R}^j = L^i + L^j$ . The probability of the event  $R^i + K_1 = U_1^l$  comes out to be  $(1/N)$  due to the randomness over the key  $K_1$ . The probability of the event  $\widehat{R}^i + \widehat{R}^j = L^i + L^j$  comes out to be at most  $(2/N)$  due to the randomness over  $\widehat{R}^j$ .
- **bad $\mu$ -source-2**.  $i, j \in [q]$  with  $i \neq j$  and  $l \in [q_5]$  such that  $S^i + K_5 = U_5^l$  and  $\widehat{S}^i + \widehat{S}^j = T^i + T^j$ . The probability of the event  $S^i + K_5 = U_5^l$  comes out to be  $(1/N)$  due to the randomness over the key  $K_5$ . The probability of the event  $\widehat{S}^i + \widehat{S}^j = T^i + T^j$  comes out to be at most  $(2/N)$  due to the randomness over  $\widehat{S}^j$ .

As we can choose the pair of indices  $(i, j)$  in  $2\binom{q}{2}$  ways and the index  $l$  in  $q_1$  or  $q_5$  ways (for **bad $\mu$ -source-1** and **bad $\mu$ -source-2** respectively), we use the union bound over all those possible choices to obtain

$$\Pr[\text{bad}\mu\text{-source}] \leq \frac{2\binom{q}{2}(q_1 + q_5)}{N^2}. \quad (125)$$



A.9 Bounding **bad $\mu$ -inner**

**Proposition 9** *Having defined the bad event **bad $\mu$ -inner** in Fig. 7, we have*

$$\Pr[\mathbf{bad}\mu\text{-inner}] \leq \frac{q(q_2q_3 + q_3q_4 + q_1q_4)}{N^2} + \frac{3q^2(q_2 + q_3 + q_4)}{N^2} + \frac{3q^3}{N^2}.$$

This bad event occurs when one of the following happens.

- **bad $\mu$ -inner-1.**  $\mathcal{I}_X \cap \mathcal{I}_{\widehat{Y}} \neq \emptyset$ . This bad event occurs when  $\exists i \in [q], j \in [q_2]$  and  $l \in [q_3]$  such that  $X^i + K_2 = U_2^j$  and  $\widehat{Y}^i + K_3 = V_3^l$ . Let's first fix the values for the indices  $i, j$  and  $l$ . The probability of each of the events  $X^i + K_2 = U_2^j$  and  $\widehat{Y}^i + K_3 = V_3^l$  comes out to be  $(1/N)$  due to the randomness over the keys  $K_2$  and  $K_3$  respectively. As we can choose the indices  $i, j$  and  $l$  in  $q, q_2$  and  $q_3$  ways respectively, we use the union bound over all those possible choices to obtain

$$\Pr[\mathbf{bad}\mu\text{-inner-1}] \leq \frac{qq_2q_3}{N^2}. \quad (126)$$

- **bad $\mu$ -inner-2.**  $\mathcal{I}_{\widehat{Y}} \cap \mathcal{I}_Z \neq \emptyset$ . This bad event occurs when  $\exists i \in [q], j \in [q_3]$  and  $l \in [q_4]$  such that  $\widehat{Y}^i + K_3 = V_3^j$  and  $Z^i + K_4 = U_4^l$ . Let's first fix the values for the indices  $i, j$  and  $l$ . The probability of each of the events  $\widehat{Y}^i + K_3 = V_3^j$  and  $Z^i + K_4 = U_4^l$  comes out to be  $(1/N)$  due to the randomness over the keys  $K_3$  and  $K_4$  respectively. As we can choose the indices  $i, j$  and  $l$  in  $q, q_3$  and  $q_4$  ways respectively, we use the union bound over all those possible choices to obtain

$$\Pr[\mathbf{bad}\mu\text{-inner-2}] \leq \frac{qq_3q_4}{N^2}. \quad (127)$$

- **bad $\mu$ -inner-3.**  $\mathcal{I}_Z \cap \mathcal{I}_X \neq \emptyset$ . This bad event occurs when  $\exists i \in [q], j \in [q_4]$  and  $l \in [q_1]$  such that  $Z^i + K_4 = U_4^j$  and  $X^i + K_1 = U_1^l$ . Let's first fix the values for the indices  $i, j$  and  $l$ . The probability of each of the events  $Z^i + K_4 = U_4^j$  and  $X^i + K_1 = U_1^l$  comes out to be  $(1/N)$  due to the randomness over the keys  $K_4$  and  $K_1$  respectively. As we can choose the indices  $i, j$  and  $l$  in  $q, q_4$  and  $q_1$  ways respectively, we use the union bound over all those possible choices to obtain

$$\Pr[\mathbf{bad}\mu\text{-inner-3}] \leq \frac{qq_4q_1}{N^2}. \quad (128)$$

- **bad $\mu$ -inner-4.**  $\mathcal{I}_X \cap \mathcal{I}_{XX} \neq \emptyset$ . This bad event occurs when  $\exists i, j \in [q]$  with  $i \neq j$  and  $l \in [q_2]$  such that  $X^i + K_2 = U_2^l$  and  $X^i = X^j$ . Let's first fix the values for the indices  $i, j$  and  $l$ . The probability of the event  $X^i + K_2 = U_2^l$  comes out to be  $(1/N)$  due to the randomness over the key  $K_2$ . The probability of the event  $X^i = X^j$  comes out to be at most  $(2/N)$  due to the  $n$ -bit randomness over  $X^i$  or  $X^j$ . As we can choose the pair of indices  $(i, j)$  in  $2\binom{q}{2}$  and  $l$  in  $q_2$  ways, we use the union bound over all those possible choices to obtain

$$\Pr[\mathbf{bad}\mu\text{-inner-4}] \leq \frac{2q_2\binom{q}{2}}{N^2}. \quad (129)$$

- **bad $\mu$ -inner-5.**  $\mathcal{I}_X \cap \mathcal{I}_{\widehat{Y}\widehat{Y}} \neq \emptyset$ . This bad event occurs when  $\exists i, j \in [q]$  with  $i \neq j$  and  $l \in [q_2]$  such that  $X^i + K_2 = U_2^l$  and  $\widehat{Y}^i = \widehat{Y}^j$ . Let's first fix the values for the indices  $i, j$  and  $l$ . The probability of the event  $X^i + K_2 = U_2^l$  comes out to be  $(1/N)$  due to the randomness over the key  $K_2$ . The probability of the event  $\widehat{Y}^i = \widehat{Y}^j$  comes out to be at most  $(2/N)$  due to the  $n$ -bit randomness over  $\widehat{Y}^i$  or  $\widehat{Y}^j$ . As we can choose the pair of indices  $(i, j)$  in  $2\binom{q}{2}$  and  $l$  in  $q_2$  ways, we use the union bound over all those possible choices to obtain

$$\Pr[\mathbf{bad}\mu\text{-inner-5}] \leq \frac{2q_2\binom{q}{2}}{N^2}. \quad (130)$$

- **bad $\mu$ -inner-6.**  $\mathcal{I}_X \cap \mathcal{I}_{ZZ} \neq \emptyset$ . This bad event occurs when  $\exists i, j \in [q]$  with  $i \neq j$  and  $l \in [q_2]$  such that  $X^i + K_2 = U_2^l$  and  $Z^i = Z^j$ . Let's first fix the values for the indices  $i, j$  and  $l$ . The probability of the event  $X^i + K_2 = U_2^l$  comes out to be  $(1/N)$  due to the randomness over the key  $K_2$ . The probability of the event  $Z^i = Z^j$  comes out to be at most  $(2/N)$  due to the  $n$ -bit randomness over  $Z^i$  or  $Z^j$ . As we can choose the pair of indices  $(i, j)$  in  $2\binom{q}{2}$  and  $l$  in  $q_2$  ways, we use the union bound over all those possible choices to obtain

$$\Pr[\text{bad}\mu\text{-inner-6}] \leq \frac{2q_2\binom{q}{2}}{N^2}. \quad (131)$$

- **bad $\mu$ -inner-7.**  $\mathcal{I}_{\hat{Y}} \cap \mathcal{I}_{XX} \neq \emptyset$ . This bad event occurs when  $\exists i, j \in [q]$  with  $i \neq j$  and  $l \in [q_3]$  such that  $\hat{Y}^i + K_3 = U_3^l$  and  $X^i = X^j$ . Let's first fix the values for the indices  $i, j$  and  $l$ . The probability of the event  $\hat{Y}^i + K_3 = U_3^l$  comes out to be  $(1/N)$  due to the randomness over the key  $K_3$ . The probability of the event  $X^i = X^j$  comes out to be at most  $(2/N)$  due to the  $n$ -bit randomness over  $X^i$  or  $X^j$ . As we can choose the pair of indices  $(i, j)$  in  $2\binom{q}{2}$  and  $l$  in  $q_3$  ways, we use the union bound over all those possible choices to obtain

$$\Pr[\text{bad}\mu\text{-inner-7}] \leq \frac{2q_3\binom{q}{2}}{N^2}. \quad (132)$$

- **bad $\mu$ -inner-8.**  $\mathcal{I}_{\hat{Y}} \cap \mathcal{I}_{\hat{Y}\hat{Y}} \neq \emptyset$ . This bad event occurs when  $\exists i, j \in [q]$  with  $i \neq j$  and  $l \in [q_3]$  such that  $\hat{Y}^i + K_3 = U_3^l$  and  $\hat{Y}^i = \hat{Y}^j$ . Let's first fix the values for the indices  $i, j$  and  $l$ . The probability of the event  $\hat{Y}^i + K_3 = U_3^l$  comes out to be  $(1/N)$  due to the randomness over the key  $K_3$ . The probability of the event  $\hat{Y}^i = \hat{Y}^j$  comes out to be at most  $(2/N)$  due to the  $n$ -bit randomness over  $\hat{Y}^i$  or  $\hat{Y}^j$ . As we can choose the pair of indices  $(i, j)$  in  $2\binom{q}{2}$  and  $l$  in  $q_3$  ways, we use the union bound over all those possible choices to obtain

$$\Pr[\text{bad}\mu\text{-inner-8}] \leq \frac{2q_3\binom{q}{2}}{N^2}. \quad (133)$$

- **bad $\mu$ -inner-9.**  $\mathcal{I}_{\hat{Y}} \cap \mathcal{I}_{ZZ} \neq \emptyset$ . This bad event occurs when  $\exists i, j \in [q]$  with  $i \neq j$  and  $l \in [q_3]$  such that  $\hat{Y}^i + K_3 = U_3^l$  and  $Z^i = Z^j$ . Let's first fix the values for the indices  $i, j$  and  $l$ . The probability of the event  $\hat{Y}^i + K_3 = U_3^l$  comes out to be  $(1/N)$  due to the randomness over the key  $K_3$ . The probability of the event  $Z^i = Z^j$  comes out to be at most  $(2/N)$  due to the  $n$ -bit randomness over  $Z^i$  or  $Z^j$ . As we can choose the pair of indices  $(i, j)$  in  $2\binom{q}{2}$  and  $l$  in  $q_3$  ways, we use the union bound over all those possible choices to obtain

$$\Pr[\text{bad}\mu\text{-inner-9}] \leq \frac{2q_3\binom{q}{2}}{N^2}. \quad (134)$$

- **bad $\mu$ -inner-10.**  $\mathcal{I}_Z \cap \mathcal{I}_{XX} \neq \emptyset$ . This bad event occurs when  $\exists i, j \in [q]$  with  $i \neq j$  and  $l \in [q_4]$  such that  $Z^i + K_4 = U_4^l$  and  $X^i = X^j$ . Let's first fix the values for the indices  $i, j$  and  $l$ . The probability of the event  $Z^i + K_4 = U_4^l$  comes out to be  $(1/N)$  due to the randomness over the key  $K_4$ . The probability of the event  $X^i = X^j$  comes out to be at most  $(2/N)$  due to the  $n$ -bit randomness over  $X^i$  or  $X^j$ . As we can choose the pair of indices  $(i, j)$  in  $2\binom{q}{2}$  and  $l$  in  $q_4$  ways, we use the union bound over all those possible choices to obtain

$$\Pr[\text{bad}\mu\text{-inner-10}] \leq \frac{2q_4\binom{q}{2}}{N^2}. \quad (135)$$

- **bad $\mu$ -inner-11.**  $\mathcal{I}_Z \cap \mathcal{I}_{\hat{Y}\hat{Y}} \neq \emptyset$ . This bad event occurs when  $\exists i, j \in [q]$  with  $i \neq j$  and  $l \in [q_4]$  such that  $Z^i + K_4 = U_4^l$  and  $\hat{Y}^i = \hat{Y}^j$ . Let's first fix the values for the indices  $i, j$  and  $l$ . The probability of the event  $Z^i + K_4 = U_4^l$  comes out to be  $(1/N)$  due to the

randomness over the key  $K_4$ . The probability of the event  $\widehat{Y}^i = \widehat{Y}^j$  comes out to be at most  $(2/N)$  due to the  $n$ -bit randomness over  $\widehat{Y}^i$  or  $\widehat{Y}^j$ . As we can choose the pair of indices  $(i, j)$  in  $2\binom{q}{2}$  and  $l$  in  $q_4$  ways, we use the union bound over all those possible choices to obtain

$$\Pr[\text{bad}\mu\text{-inner-11}] \leq \frac{2q_4\binom{q}{2}}{N^2}. \quad (136)$$

- **bad $\mu$ -inner-12.**  $\mathcal{I}_Z \cap \mathcal{I}_{ZZ} \neq \emptyset$ . This bad event occurs when  $\exists i, j \in [q]$  with  $i \neq j$  and  $l \in [q_4]$  such that  $Z^i + K_4 = U_4^l$  and  $Z^i = Z^j$ . Let's first fix the values for the indices  $i, j$  and  $l$ . The probability of the event  $Z^i + K_4 = U_4^l$  comes out to be  $(1/N)$  due to the randomness over the key  $K_4$ . The probability of the event  $Z^i = Z^j$  comes out to be at most  $(2/N)$  due to the  $n$ -bit randomness over  $Z^i$  or  $Z^j$ . As we can choose the pair of indices  $(i, j)$  in  $2\binom{q}{2}$  and  $l$  in  $q_4$  ways, we use the union bound over all those possible choices to obtain

$$\Pr[\text{bad}\mu\text{-inner-12}] \leq \frac{2q_4\binom{q}{2}}{N^2}. \quad (137)$$

- **bad $\mu$ -inner-13.**  $\mathcal{I}_{XX} \cap \mathcal{I}_{\widehat{Y}\widehat{Y}} \neq \emptyset$ . This bad event occurs when  $\exists i, j, l \in [q]$  with  $i \neq j$  and  $i \neq l$  such that  $X^i = X^j$  and  $\widehat{Y}^i = \widehat{Y}^l$ . Let's first fix the values for the indices  $i, j$  and  $l$ . The probability of each of the events comes out to be at most  $(2/N)$  due to the  $n$ -bit randomness of  $X^i$  or  $X^j$  and  $\widehat{Y}^i$  or  $\widehat{Y}^j$ . As we can choose the index  $i$  in  $q$  ways and for each of those choices, we can choose each of the indices  $j$  and  $l$  in  $(q-1)$  ways, we use the union bound over all those possible choices to obtain

$$\Pr[\text{bad}\mu\text{-inner-13}] \leq \frac{q(q-1)^2}{N^2}. \quad (138)$$

- **bad $\mu$ -inner-14.**  $\mathcal{I}_{\widehat{Y}\widehat{Y}} \cap \mathcal{I}_{ZZ} \neq \emptyset$ . This bad event occurs when  $\exists i, j, l \in [q]$  with  $i \neq j$  and  $i \neq l$  such that  $\widehat{Y}^i = \widehat{Y}^j$  and  $Z^i = Z^l$ . Let's first fix the values for the indices  $i, j$  and  $l$ . The probability of each of the events comes out to be at most  $(2/N)$  due to the  $n$ -bit randomness of  $\widehat{Y}^i$  or  $\widehat{Y}^j$  and  $Z^i$  or  $Z^j$ . As we can choose the index  $i$  in  $q$  ways and for each of those choices, we can choose each of the indices  $j$  and  $l$  in  $(q-1)$  ways, we use the union bound over all those possible choices to obtain

$$\Pr[\text{bad}\mu\text{-inner-14}] \leq \frac{q(q-1)^2}{N^2}. \quad (139)$$

- **bad $\mu$ -inner-15.**  $\mathcal{I}_{ZZ} \cap \mathcal{I}_{XX} \neq \emptyset$ . This bad event occurs when  $\exists i, j, l \in [q]$  with  $i \neq j$  and  $i \neq l$  such that  $Z^i = Z^j$  and  $X^i = X^l$ . Let's first fix the values for the indices  $i, j$  and  $l$ . The probability of each of the events comes out to be at most  $(2/N)$  due to the  $n$ -bit randomness of  $Z^i$  or  $Z^j$  and  $X^i$  or  $X^j$ . As we can choose the index  $i$  in  $q$  ways and for each of those choices, we can choose each of the indices  $j$  and  $l$  in  $(q-1)$  ways, we use the union bound over all those possible choices to obtain

$$\Pr[\text{bad}\mu\text{-inner-15}] \leq \frac{q(q-1)^2}{N^2}. \quad (140)$$

By combining Eqn. (126)-Eqn. (140), we have

$$\Pr[\text{bad}\mu\text{-inner}] \leq \frac{q(q_2q_3 + q_3q_4 + q_1q_4)}{N^2} + \frac{3q^2(q_2 + q_3 + q_4)}{N^2} + \frac{3q^3}{N^2}. \quad (141)$$

A.10 Bounding **bad $\mu$ -3coll**

**Proposition 10** *Having defined the bad event **bad $\mu$ -3coll** in Fig. 7, we have*

$$\Pr[\mathbf{bad}\mu\text{-3coll}] \leq \frac{4\binom{q}{3}}{N^2}.$$

To prove the proposition, we first fix the values for the indices  $i, j$  and  $l$ .

- **bad $\mu$ -3coll-1.**  $i, j, l \in [q]$  with  $i < j < l$  such that  $X^i = X^j = X^l$ . We can write  $\Pr[X^i = X^j = X^l] = \Pr[X^i = X^j] \cdot \Pr[X^i = X^j = X^l | X^i = X^j]$  (as  $\Pr[X^i = X^j = X^l | X^i \neq X^j] = 0$ ). Each term on the RHS can be at most  $(2/N)$  due to the randomness over  $X^j$  and  $X^l$  respectively.
- **bad $\mu$ -3coll-2.**  $i, j, l \in [q]$  with  $i < j < l$  such that  $\widehat{Y}^i = \widehat{Y}^j = \widehat{Y}^l$ . We can write  $\Pr[\widehat{Y}^i = \widehat{Y}^j = \widehat{Y}^l] = \Pr[\widehat{Y}^i = \widehat{Y}^j] \cdot \Pr[\widehat{Y}^i = \widehat{Y}^j = \widehat{Y}^l | \widehat{Y}^i = \widehat{Y}^j]$  (as  $\Pr[\widehat{Y}^i = \widehat{Y}^j = \widehat{Y}^l | \widehat{Y}^i \neq \widehat{Y}^j] = 0$ ). Each term on the RHS can be at most  $(2/N)$  due to the randomness over  $\widehat{Y}^j$  and  $\widehat{Y}^l$  respectively.
- **bad $\mu$ -3coll-3.**  $i, j, l \in [q]$  with  $i < j < l$  such that  $Z^i = Z^j = Z^l$ . We can write  $\Pr[Z^i = Z^j = Z^l] = \Pr[Z^i = Z^j] \cdot \Pr[Z^i = Z^j = Z^l | Z^i = Z^j]$  (as  $\Pr[Z^i = Z^j = Z^l | Z^i \neq Z^j] = 0$ ). Each term on the RHS can be at most  $(2/N)$  due to the randomness over  $Z^j$  and  $Z^l$  respectively.

As we can choose the 3-tuple of indices  $(i, j, l)$  in  $\binom{q}{3}$  ways, we use the union bound over all those possible choices to obtain

$$\Pr[\mathbf{bad}\mu\text{-3coll}] \leq \frac{4\binom{q}{3}}{N^2}. \quad (142)$$

A.11 Bounding **bad $\mu$ -size**

**Proposition 11** *Having defined the bad event **bad $\mu$ -size** in Fig. 7, we have*

$$\Pr[\mathbf{bad}\mu\text{-size}] \leq \frac{q^{1/2}(q_2 + q_3 + q_4)}{N} + \frac{2q^{3/2}}{N}.$$

We say that the bad event **bad $\mu$ -size** happens if one of the following event happens.

- **bad $\mu$ -size-prim** This event holds if either of the following three events hold:
  - **bad $\mu$ -size- $\mathcal{I}_X$ :** This event holds if  $|\mathcal{I}_X| > q^{1/2}$ .
  - **bad $\mu$ -size- $\mathcal{I}_{\widehat{Y}}$ :** This event holds if  $|\mathcal{I}_{\widehat{Y}}| > q^{1/2}$ .
  - **bad $\mu$ -size- $\mathcal{I}_Z$ :** This event holds if  $|\mathcal{I}_Z| > q^{1/2}$ .
- **bad $\mu$ -size-coll** This event holds if either of the following three events hold:
  - **bad $\mu$ -size- $\mathcal{I}_{XX}$ :** This event holds if  $|\mathcal{I}_{XX}| > q^{1/2}$ .
  - **bad $\mu$ -size- $\mathcal{I}_{\widehat{Y}\widehat{Y}}$ :** This event holds if  $|\mathcal{I}_{\widehat{Y}\widehat{Y}}| > q^{1/2}$ .
  - **bad $\mu$ -size- $\mathcal{I}_{ZZ}$ :** This event holds if  $|\mathcal{I}_{ZZ}| > q^{1/2}$ .

A.11.1 Bounding **bad $\mu$ -size-prim**

To bound this event, we bound each of the following events: **bad $\mu$ -size- $\mathcal{I}_X$** , **bad $\mu$ -size- $\mathcal{I}_{\widehat{Y}}$** , and **bad $\mu$ -size- $\mathcal{I}_Z$** . We begin with bounding the size of  $|\mathcal{I}_X|$ . Let for each  $i \in [q]$ ,  $\mathbb{I}_i$  be an indicator random variable that takes the value 1 if there exists an  $j \in [q_2]$  such that  $X^i + K_2 = U_2^j$ . Note that, the probability of this event holds is at most  $q_2/N$  using the randomness of key  $K_2$ , i.e., for a fixed  $i \in [q]$ ,

$$\Pr[\mathbb{I}_i = 1] \leq \frac{q_2}{N}.$$

Therefore, by the linearity of expectations and by applying Markov's inequality, we have

$$\Pr[|\mathcal{I}_X| > q^{1/2}] \leq \frac{q^{1/2}q_2}{N} \approx \frac{q^{3/2}}{N}, \quad (\text{provided, } q_2 \approx q).$$

In a similar way, we can show that

$$\Pr[|\mathcal{I}_{\hat{Y}}| > q^{1/2}] \leq \frac{q^{1/2}q_3}{N}, \quad \Pr[|\mathcal{I}_Z| > q^{1/2}] \leq \frac{q^{1/2}q_4}{N}.$$

By combining the above three cases, we have

$$\Pr[\text{bad}\mu\text{-size-prim}] \leq \frac{q^{1/2}(q_2 + q_3 + q_4)}{N}. \quad (143)$$

### A.11.2 Bounding *bad* $\mu$ -size-coll

To bound this event, we bound each of the following events: *bad* $\mu$ -size- $\mathcal{I}_{XX}$ , *bad* $\mu$ -size- $\mathcal{I}_{\hat{Y}\hat{Y}}$ , and *bad* $\mu$ -size- $\mathcal{I}_{ZZ}$ . We begin with bounding the size of  $|\mathcal{I}_{XX}|$ . Let for each  $i \in [q]$ ,  $\mathbb{I}_i$  be an indicator random variable that takes the value 1 if there exists an  $j \in [q]$  with  $j \neq i$  such that  $X^i = X^j$ . Note that, the probability of this event holds is at most  $q/N$  using the randomness of key  $\hat{R}^i$  (as  $i \notin \mathcal{I}_R$ ), i.e., for a fixed  $i \in [q]$ ,

$$\Pr[\mathbb{I}_i = 1] \leq \frac{q}{N}.$$

Therefore, by the linearity of expectations and by applying Markov's inequality, we have

$$\Pr[|\mathcal{I}_{XX}| > q^{1/2}] \leq \frac{q^{3/2}}{2N}.$$

In a similar way, we can show that

$$\Pr[|\mathcal{I}_{\hat{Y}\hat{Y}}| > q^{1/2}] \leq \frac{q^{3/2}}{2N}, \quad \Pr[|\mathcal{I}_{ZZ}| > q^{1/2}] \leq \frac{q^{3/2}}{2N}.$$

By combining the above three cases, we have

$$\Pr[\text{bad}\mu\text{-size-coll}] \leq \frac{2q^{3/2}}{N}. \quad (144)$$

Finally, by combining Eqn. (143) and Eqn. (144), we have

$$\Pr[\text{bad}\mu\text{-size}] \leq \frac{q^{1/2}(q_2 + q_3 + q_4)}{N} + \frac{2q^{3/2}}{N}.$$

### A.12 Bounding *bad* $\lambda$ -prim

**Proposition 12** *Having defined the bad event *bad* $\lambda$ -prim in Fig. 8, we have*

$$\begin{aligned} \Pr[\text{bad}\lambda\text{-prim}] \leq & \frac{qq_2(q_1 + q_3 + q_4 + q_5)}{N^2} + \frac{qq_3(q_1 + q_2 + q_4 + q_5)}{N^2} \\ & + \frac{qq_4(q_1 + q_2 + q_3 + q_5)}{N^2} + \frac{7q^2(q_2 + q_3 + q_4)}{N^2}. \end{aligned}$$

We say that the bad event *bad* $\lambda$ -prim happens if one of the following event happens.

- **bad** $\lambda$ -prim 1.  $\exists i \in (\mathcal{I}_X \sqcup \mathcal{I}_{**})^c$  and  $j \in [q_2]$  such that  $\hat{X}^i + k_2 = V_2^j$ .
- **bad** $\lambda$ -prim 2.  $\exists i \in (\mathcal{I}_{\hat{Y}} \sqcup \mathcal{I}_{**})^c$  and  $j \in [q_3]$  such that  $Y^i + k_3 = V_3^j$ .
- **bad** $\lambda$ -prim 3.  $\exists i \in (\mathcal{I}_Z \sqcup \mathcal{I}_{**})^c$  and  $j \in [q_4]$  such that  $\hat{Z}^i + k_4 = V_4^j$ .

In the following subsections, we bound the above events.

A.12.1 Bounding **bad $\lambda$ -prim 1**

To bound this event, we further split it into various sub-cases and bound their individual probabilities as follows:

- **bad $\lambda$ -prim 1a.**  $\exists i \in \mathcal{I}_R$  and  $j \in [q_2]$  such that  $\widehat{X}^i + K_2 = V_2^j$ . In other words,  $\exists i \in [q]$ ,  $j \in [q_2]$  and  $l \in [q_1]$  such that  $R^i + K_1 = U_1^l$  and  $\widehat{X}^i + K_2 = V_2^j$ . Let's first fix the values for the indices  $i$ ,  $j$  and  $l$ . The probability of each of the events  $R^i + K_1 = U_1^l$  and  $\widehat{X}^i + K_2 = V_2^j$  comes out to be  $1/N^2$  each due to the randomness of the keys  $K_1$  and  $K_2$  respectively. As we can choose the index  $i$ ,  $j$  and  $l$  in  $q$ ,  $q_2$  and  $q_1$  ways respectively, we use the union bound over all those possible choices to obtain

$$\Pr[\text{bad}\lambda\text{-prim 1a}] \leq \frac{qq_1q_2}{N^2}. \quad (145)$$

- **bad $\lambda$ -prim 1b.**  $\exists i \in \mathcal{I}_S$  and  $j \in [q_2]$  such that  $\widehat{X}^i + K_2 = V_2^j$ . Analysis of this bad event is similar to that of **bad $\lambda$ -prim 1a**, where we use the randomness of  $K_5$  and  $K_2$ . Looking ahead, we bound the probability of the event to at most

$$\Pr[\text{bad}\lambda\text{-prim 1b}] \leq \frac{qq_2q_5}{N^2}. \quad (146)$$

- **bad $\lambda$ -prim 1c.**  $\exists i \in \mathcal{I}_{RR}$  and  $j \in [q_2]$  such that  $\widehat{X}^i + K_2 = V_2^j$ . Analysis of this bad event is similar to that of **bad $\lambda$ -prim 1a**, where we use the randomness of  $R^i$  and  $K_2$ . Looking ahead, we bound the probability of the event to at most

$$\Pr[\text{bad}\lambda\text{-prim 1c}] \leq \frac{q^2q_2}{2N^2}. \quad (147)$$

- **bad $\lambda$ -prim 1d.**  $\exists i \in \mathcal{I}_{SS}$  and  $j \in [q_2]$  such that  $\widehat{X}^i + K_2 = V_2^j$ . Again, analysis of this bad event is similar to that of **bad $\lambda$ -prim 1c**, where we use the randomness of  $S^i$  and  $K_2$ . Looking ahead, we bound the probability of the event to at most

$$\Pr[\text{bad}\lambda\text{-prim 1d}] \leq \frac{q^2q_2}{2N^2}. \quad (148)$$

- **bad $\lambda$ -prim 1e.**  $\exists i \in \mathcal{I}_{\widehat{Y}}$  and  $j \in [q_2]$  such that  $\widehat{X}^i + K_2 = V_2^j$ . In other words,  $\exists i \in [q]$ ,  $j \in [q_2]$  and  $l \in [q_3]$  such that  $\widehat{Y}^i + K_3 = V_3^l$  and  $\widehat{X}^i + K_2 = V_2^j$ . Let's first fix the values for the indices  $i$ ,  $j$  and  $l$ . The probability of each of the events  $\widehat{Y}^i + K_3 = V_3^l$  and  $\widehat{X}^i + K_2 = V_2^j$  comes out to be  $1/N^2$  due to the randomness of the keys  $K_2$  and  $K_3$ . As we can choose the index  $i$ ,  $j$  and  $l$  in  $q$ ,  $q_2$  and  $q_3$  ways, we use the union bound over all those possible choices to obtain

$$\Pr[\text{bad}\lambda\text{-prim 1e}] \leq \frac{qq_2q_3}{N^2}. \quad (149)$$

- **bad $\lambda$ -prim 1f.**  $\exists i \in \mathcal{I}_Z$  and  $j \in [q_2]$  such that  $\widehat{X}^i + K_2 = V_2^j$ . Analysis of this bad event is similar to that of **bad $\lambda$ -prim 1e**, where we use the randomness of  $K_4$  and  $K_2$ . Looking ahead, we bound the probability of the above event to at most

$$\Pr[\text{bad}\lambda\text{-prim 1f}] \leq \frac{qq_2q_4}{N^2}. \quad (150)$$

- **bad $\lambda$ -prim 1g.**  $\exists i \in \mathcal{I}_{XX}$  and  $j \in [q_2]$  such that  $\widehat{X}^i + K_2 = V_2^j$ . In other words,  $\exists i \in [q]$ ,  $j \in [q_2]$  and  $l \in [q]$  such that  $i \neq l$  and  $X^i = X^l$ ,  $\widehat{X}^i + K_2 = V_2^j$ , which we equivalently write as

$$\widehat{R}^i + \widehat{R}^l = L^i + L^l, \widehat{X}^i + K_2 = V_2^j.$$

For a fixed choice of indices, we use the randomness of  $\widehat{R}^i$  and  $K_2$  to bound the probability of the event to at most  $2/N^2$ . As we can choose the index  $i, j$  and  $l$  in  $q$ ,  $q_2$  and  $(q-1)$  ways respectively, we use the union bound over all those possible choices to obtain

$$\Pr[\text{bad}\lambda\text{-prim 1g}] \leq \frac{2q^2q_2}{N^2}. \quad (151)$$

- **bad $\lambda$ -prim 1h.**  $\exists i \in \mathcal{I}_{\widehat{Y}\widehat{Y}}$  and  $j \in [q_2]$  such that  $\widehat{X}^i + K_2 = V_2^j$ . In other words,  $\exists i \in [q]$ ,  $j \in [q_2]$  and  $l \in [q]$  such that  $i \neq l$  and  $\widehat{Y}^i = \widehat{Y}^l$ ,  $\widehat{X}^i + K_2 = V_2^j$ , which we equivalently write as

$$\widehat{R}^i + \widehat{R}^l + \widehat{S}^i + \widehat{S}^l = L^i + T^i + L^l + T^l, \widehat{X}^i + K_2 = V_2^j.$$

For a fixed choice of indices, we use the randomness of  $\widehat{R}^i$  and  $K_2$  to bound the probability of the event to at most  $2/N^2$ . As we can choose the index  $i, j$  and  $l$  in  $q, q_2$  and  $(q-1)$  ways respectively, we use the union bound over all those possible choices to obtain

$$\Pr[\text{bad}\lambda\text{-prim 1h}] \leq \frac{2q^2q_2}{N^2}. \quad (152)$$

- **bad $\lambda$ -prim 1i.**  $\exists i \in \mathcal{I}_{ZZ}$  and  $j \in [q_2]$  such that  $\widehat{X}^i + K_2 = V_2^j$ . In other words,  $\exists i \in [q]$ ,  $j \in [q_2]$  and  $l \in [q]$  such that  $i \neq l$  and  $Z^i = Z^l$ ,  $\widehat{X}^i + K_2 = V_2^j$ , which we equivalently write as

$$\widehat{S}^i + \widehat{S}^l = T^i + T^l, \widehat{X}^i + K_2 = V_2^j.$$

For a fixed choice of indices, we use the randomness of  $\widehat{S}^i$  and  $K_2$  to bound the probability of the event to at most  $2/N^2$ . As we can choose the index  $i, j$  and  $l$  in  $q, q_2$  and  $(q-1)$  ways respectively, we use the union bound over all those possible choices to obtain

$$\Pr[\text{bad}\lambda\text{-prim 1i}] \leq \frac{2q^2q_2}{N^2}. \quad (153)$$

Adding all the above nine cases, we obtain

$$\Pr[\text{bad}\lambda\text{-prim 1}] \leq \frac{qq_2(q_1 + q_3 + q_4 + q_5 + 7q)}{N^2}. \quad (154)$$

### A.12.2 Bounding **bad $\lambda$ -prim 2.**

As before, to bound this event, we further split it into various sub-cases and bound their individual probabilities as follows:

- **bad $\lambda$ -prim 2a.**  $\exists i \in \mathcal{I}_R$  and  $j \in [q_3]$  such that  $\widehat{Y}^i + K_3 = V_3^j$ . In other words,  $\exists i \in [q]$ ,  $j \in [q_2]$  and  $l \in [q_1]$  such that  $R^i + K_1 = U_1^l$  and  $\widehat{Y}^i + K_3 = V_3^j$ . Let's first fix the values for the indices  $i, j$  and  $l$ . The probability of each of the events  $R^i + K_1 = U_1^l$  and  $\widehat{Y}^i + K_3 = V_3^j$  comes out to be  $1/N^2$  each due to the randomness of the keys  $K_1$  and  $K_3$  respectively. As we can choose the index  $i, j$  and  $l$  in  $q, q_3$  and  $q_1$  ways respectively, we use the union bound over all those possible choices to obtain

$$\Pr[\text{bad}\lambda\text{-prim 2a}] \leq \frac{qq_1q_3}{N^2}. \quad (155)$$

- **bad $\lambda$ -prim 2b.**  $\exists i \in \mathcal{I}_S$  and  $j \in [q_3]$  such that  $\widehat{Y}^i + K_3 = V_3^j$ . Analysis of this bad event is similar to that of **bad $\lambda$ -prim 2a**, where we use the randomness of  $K_5$  and  $K_3$ . Looking ahead, we bound the probability of the event to at most

$$\Pr[\text{bad}\lambda\text{-prim 2b}] \leq \frac{qq_3q_5}{N^2}. \quad (156)$$

- **bad $\lambda$ -prim 2c.**  $\exists i \in \mathcal{I}_{RR}$  and  $j \in [q_3]$  such that  $\widehat{Y}^i + K_3 = V_3^j$ . Analysis of this bad event is similar to that of **bad $\lambda$ -prim 2a**, where we use the randomness of  $R^i$  and  $K_3$ . Looking ahead, we bound the probability of the event to at most

$$\Pr[\text{bad}\lambda\text{-prim 2c}] \leq \frac{q^2q_3}{2N^2}. \quad (157)$$

- **bad $\lambda$ -prim 2d**.  $\exists i \in \mathcal{I}_{SS}$  and  $j \in [q_3]$  such that  $\widehat{Y}^i + K_3 = V_3^j$ . Analysis of this bad event is similar to that of **bad $\lambda$ -prim 2c**, where we use the randomness of  $S^i$  and  $K_3$ . Looking ahead, we bound the probability of the event to at most

$$\Pr[\text{bad}\lambda\text{-prim } 2d] \leq \frac{q^2 q_3}{2N^2}. \quad (158)$$

- **bad $\lambda$ -prim 2e**.  $\exists i \in \mathcal{I}_Z$  and  $j \in [q_3]$  such that  $\widehat{Y}^i + K_3 = V_3^j$ . Analysis of this bad event is again similar to that of **bad $\lambda$ -prim 1f**, where we use the randomness of  $K_4$  and  $K_3$ . Looking ahead, we bound the probability of the event to at most

$$\Pr[\text{bad}\lambda\text{-prim } 2e] \leq \frac{qq_3q_4}{N^2}. \quad (159)$$

- **bad $\lambda$ -prim 2f**.  $\exists i \in \mathcal{I}_X$  and  $j \in [q_3]$  such that  $\widehat{Y}^i + K_3 = V_3^j$ . Analysis of this bad event is again similar to that of **bad $\lambda$ -prim 2a**, where we use the randomness of  $K_2$  and  $K_3$ . Looking ahead, we bound the probability of the event to at most

$$\Pr[\text{bad}\lambda\text{-prim } 2f] \leq \frac{qq_2q_3}{N^2}. \quad (160)$$

- **bad $\lambda$ -prim 2g**.  $\exists i \in \mathcal{I}_{XX}$  and  $j \in [q_3]$  such that  $\widehat{Y}^i + K_3 = V_3^j$ . Analysis of this event is similar to that of **bad $\lambda$ -prim 1g**, where we use the randomness of  $\widehat{R}^i$  and  $K_3$ . Looking ahead, we bound the probability of the event to at most

$$\Pr[\text{bad}\lambda\text{-prim } 2g] \leq \frac{2q^2q_3}{N^2}. \quad (161)$$

- **bad $\lambda$ -prim 2h**.  $\exists i \in \mathcal{I}_{\widehat{Y}\widehat{Y}}$  and  $j \in [q_3]$  such that  $\widehat{Y}^i + K_3 = V_3^j$ . Analysis of this event is similar to that of **bad $\lambda$ -prim 1h**, where we use the randomness of  $\widehat{R}^i$  and  $K_3$ . Looking ahead, we bound the probability of the event to at most

$$\Pr[\text{bad}\lambda\text{-prim } 2h] \leq \frac{2q^2q_3}{N^2}. \quad (162)$$

- **bad $\lambda$ -prim 2i**.  $\exists i \in \mathcal{I}_{ZZ}$  and  $j \in [q_3]$  such that  $\widehat{Y}^i + K_3 = V_3^j$ . Again, the analysis of this event is similar to that of **bad $\lambda$ -prim 1i**, where we use the randomness of  $\widehat{S}^i$  and  $K_3$ . Looking ahead, we bound the probability of the event to at most

$$\Pr[\text{bad}\lambda\text{-prim } 2i] \leq \frac{2q^2q_3}{N^2}. \quad (163)$$

Adding all the above nine cases, we obtain

$$\Pr[\text{bad}\lambda\text{-prim } 2] \leq \frac{qq_3(q_1 + q_2 + q_4 + q_5 + 7q)}{N^2}. \quad (164)$$

### A.12.3 Bounding **bad $\lambda$ -prim 3**.

As before, to bound this event, we further split it into various sub-cases and bound their individual probabilities as follows:

- **bad $\lambda$ -prim 3a**.  $\exists i \in \mathcal{I}_R$  and  $j \in [q_4]$  such that  $\widehat{Z}^i + K_4 = V_4^j$ . In other words,  $\exists i \in [q]$ ,  $j \in [q_4]$  and  $l \in [q_1]$  such that  $R^i + K_1 = U_1^l$  and  $\widehat{Z}^i + K_4 = V_4^j$ . Let's first fix the values for the indices  $i$ ,  $j$  and  $l$ . The probability of each of the events  $R^i + K_1 = U_1^l$  and  $\widehat{Z}^i + K_4 = V_4^j$  comes out to be  $1/N^2$  each due to the randomness of the keys  $K_1$  and  $K_4$  respectively. As we can choose the index  $i$ ,  $j$  and  $l$  in  $q$ ,  $q_4$  and  $q_1$  ways respectively, we use the union bound over all those possible choices to obtain

$$\Pr[\text{bad}\lambda\text{-prim } 3a] \leq \frac{qq_1q_4}{N^2}. \quad (165)$$



- **bad $\lambda$ -prim 3b.**  $\exists i \in \mathcal{I}_S$  and  $j \in [q_4]$  such that  $\widehat{Z}^i + K_4 = V_4^j$ . Analysis of this bad event is similar to that of **bad $\lambda$ -prim 3a**, where we use the randomness of  $K_5$  and  $K_4$ . Looking ahead, we bound the probability of the event to at most

$$\Pr[\text{bad}\lambda\text{-prim 3b}] \leq \frac{qq_4q_5}{N^2}. \quad (166)$$

- **bad $\lambda$ -prim 3c.**  $\exists i \in \mathcal{I}_{RR}$  and  $j \in [q_4]$  such that  $\widehat{Z}^i + K_4 = V_4^j$ . Analysis of this bad event is similar to that of **bad $\lambda$ -prim 3a**, where we use the randomness of  $R^i$  and  $K_4$ . Looking ahead, we bound the probability of the event to at most

$$\Pr[\text{bad}\lambda\text{-prim 3c}] \leq \frac{q^2q_4}{2N^2}. \quad (167)$$

- **bad $\lambda$ -prim 3d.**  $\exists i \in \mathcal{I}_{SS}$  and  $j \in [q_4]$  such that  $\widehat{Z}^i + K_4 = V_4^j$ . Analysis of this bad event is similar to that of **bad $\lambda$ -prim 3a**, where we use the randomness of  $S^i$  and  $K_4$ . Looking ahead, we bound the probability of the event to at most

$$\Pr[\text{bad}\lambda\text{-prim 3d}] \leq \frac{q^2q_4}{2N^2}. \quad (168)$$

- **bad $\lambda$ -prim 3e.**  $\exists i \in \mathcal{I}_X$  and  $j \in [q_4]$  such that  $\widehat{Z}^i + K_4 = V_4^j$ . Analysis of this bad event is similar to that of **bad $\lambda$ -prim 3a**, where we use the randomness of  $K_2$  and  $K_4$ . Looking ahead, we bound the probability of the event to at most

$$\Pr[\text{bad}\lambda\text{-prim 3e}] \leq \frac{qq_2q_4}{N^2}. \quad (169)$$

- **bad $\lambda$ -prim 3f.**  $\exists i \in \mathcal{I}_{\widehat{\gamma}}$  and  $j \in [q_4]$  such that  $\widehat{Z}^i + K_4 = V_4^j$ . Analysis of this bad event is similar to that of **bad $\lambda$ -prim 3a**, where we use the randomness of  $K_3$  and  $K_4$ . Looking ahead, we bound the probability of the event to at most

$$\Pr[\text{bad}\lambda\text{-prim 3f}] \leq \frac{qq_3q_4}{N^2}. \quad (170)$$

- **bad $\lambda$ -prim 3g.**  $\exists i \in \mathcal{I}_{XX}$  and  $j \in [q_4]$  such that  $\widehat{Z}^i + K_4 = V_4^j$ . Analysis of this bad event is similar to that of **bad $\lambda$ -prim 1g**, where we use the randomness of  $\widehat{R}^i$  and  $K_4$ . Looking ahead, we bound the probability of the event to at most

$$\Pr[\text{bad}\lambda\text{-prim 3g}] \leq \frac{2q^2q_4}{N^2}. \quad (171)$$

- **bad $\lambda$ -prim 3h.**  $\exists i \in \mathcal{I}_{\widehat{\gamma}\widehat{\gamma}}$  and  $j \in [q_4]$  such that  $\widehat{Z}^i + K_4 = V_4^j$ . Analysis of this bad event is similar to that of **bad $\lambda$ -prim 1h**, where we use the randomness of  $\widehat{R}^i$  and  $K_4$ . Looking ahead, we bound the probability of the event to at most

$$\Pr[\text{bad}\lambda\text{-prim 3h}] \leq \frac{2q^2q_4}{N^2}. \quad (172)$$

- **bad $\lambda$ -prim 3i.**  $\exists i \in \mathcal{I}_{ZZ}$  and  $j \in [q_4]$  such that  $\widehat{Z}^i + K_4 = V_4^j$ . Analysis of this bad event is similar to that of **bad $\lambda$ -prim 1i**, where we use the randomness of  $\widehat{S}^i$  and  $K_4$ . Looking ahead, we bound the probability of the event to at most

$$\Pr[\text{bad}\lambda\text{-prim 3i}] \leq \frac{2q^2q_4}{N^2}. \quad (173)$$

Adding all the above nine cases, we obtain

$$\Pr[\text{bad}\lambda\text{-prim 3}] \leq \frac{qq_4(q_1 + q_2 + q_3 + q_5 + 7q)}{N^2}. \quad (174)$$

A.13 Bounding **bad $\lambda$ -coll**

**Proposition 13** *Having defined the bad event **bad $\lambda$ -coll** in Fig. 8, we have*

$$\Pr[\text{bad}\lambda\text{-coll}] \leq \frac{\binom{q}{2}(5q + q_1 + q_2 + q_3 + q_4 + q_5)}{N^2}.$$

We say that the bad event **bad $\lambda$ -coll** happens, if one of the following event happens.

- **bad $\lambda$ -coll 1.**  $\exists i \in \mathcal{I}_{**}^c, j \in [q]$  and  $i \neq j$  such that  $X^i \neq X^j$  and  $\widehat{X}^i = \widehat{X}^j$ .
- **bad $\lambda$ -coll 2.**  $\exists i \in \mathcal{I}_{**}^c, j \in [q]$  and  $i \neq j$  such that  $\widehat{Y}^i \neq \widehat{Y}^j$  and  $Y^i = Y^j$ .
- **bad $\lambda$ -coll 3.**  $\exists i \in \mathcal{I}_{**}^c, j \in [q]$  and  $i \neq j$  such that  $Z^i \neq Z^j$  and  $\widehat{Z}^i = \widehat{Z}^j$ .

In the following subsection, we bound the above events. To do this, we first define a condition set and then analyze these three bad events on that condition set.

**Condition Set**

1.  $\exists i \in \mathcal{I}_R$ . In other words,  $\exists i \in [q]$  and  $k \in [q_1]$  such that  $R^i + K_1 = U_1^k$ .
2.  $\exists i \in \mathcal{I}_S$ . In other words,  $\exists i \in [q]$  and  $k \in [q_5]$  such that  $S^i + K_5 = U_5^k$ .
3.  $\exists i \in \mathcal{I}_{RR}$ . In other words,  $\exists i \in \mathcal{I}_{\text{dec}}$  and  $k \in [i-1]$  such that  $R^i = R^k$ .
4.  $\exists i \in \mathcal{I}_{SS}$ . In other words,  $\exists i \in \mathcal{I}_{\text{enc}}$  and  $k \in [i-1]$  such that  $S^i = S^k$ .
5.  $\exists i \in \mathcal{I}_X$ . In other words,  $\exists i \in [q]$  and  $k \in [q_2]$  such that  $X^i + K_2 = U_2^k$ .
6.  $\exists i \in \mathcal{I}_{\widehat{Y}}$ . In other words,  $\exists i \in [q]$  and  $k \in [q_3]$  such that  $\widehat{Y}^i + K_3 = U_3^k$ .
7.  $\exists i \in \mathcal{I}_Z$ . In other words,  $\exists i \in [q]$  and  $k \in [q_4]$  such that  $Z^i + K_4 = U_4^k$ .
8.  $\exists i \in \mathcal{I}_{XX}$ . In other words,  $\exists i, k \in [q]$  with  $i \neq j$  such that  $X^i = X^k$ .
9.  $\exists i \in \mathcal{I}_{\widehat{Y}\widehat{Y}}$ . In other words,  $\exists i, k \in [q]$  with  $i \neq j$  such that  $\widehat{Y}^i = \widehat{Y}^k$ .
10.  $\exists i \in \mathcal{I}_{ZZ}$ . In other words,  $\exists i, k \in [q]$  with  $i \neq j$  such that  $Z^i = Z^k$ .

Let's first fix the values for the indices  $i, j$  and  $k$ . For any of **bad $\lambda$ -coll 1**, **bad $\lambda$ -coll 2** and **bad $\lambda$ -coll 3**, any one of the conditions from the above condition set satisfies. Once we fix that condition, the probability of that condition comes out to be  $(1/N)$ . On the other hand, the probability of the event  $\widehat{X}^i = \widehat{X}^j$  is at most  $(2/N)$  when  $j \in \mathcal{I}_X$ , and is equal to  $(1/N)$  otherwise. Similarly, the probability of the event  $Y^i = Y^j$  is at most  $(2/N)$  when  $j \in \mathcal{I}_Y$ , and is equal to  $(1/N)$  otherwise; and the probability of the event  $\widehat{Z}^i = \widehat{Z}^j$  is at most  $(2/N)$  when  $j \in \mathcal{I}_Z$ , and is equal to  $(1/N)$  otherwise. Now one can choose the pair of indices  $(i, j)$  in  $\binom{q}{2}$  ways, and the index  $k$  in as many ways as the maximum number of queries to the relevant permutation (in case of condition 1, 2, 5, 6 and 7) or in  $q$  ways (otherwise). Using the union bound over all those possible indices, we obtain the upper bound of each of these bad events as  $(2q \cdot \binom{q}{2})/(N^2)$  or  $(2q_l \cdot \binom{q}{2})/(N^2)$  (where the relevant permutation is  $P_l$ ).
